# Supplementary material for: Metal ion co-ordination of a tripodal imidazole-derivative and its tridentate constituent: equilibrium and structural studies
Source: Royal Society of Chemistry journal article supplement (doi:10.1039/b111275a), 2002-01-01
Supplement: b111275a.doc [file b111275a.doc]

**Supplementary information for**

**Metal ion co-ordination of a tripodal imidazole-derivative and its tridentate constituent: equilibrium and structural studies**

Attila Jancsó, Ibolya Török, László Korecz, Antal Rockenbauer and Tamás Gajda*

**Figure S1.** Individual electronic absorption spectra of the main species formed in the imhm - copper(II) system. **A**: CuL, **B**: CuLH–1, **C**: Cu4L4H–4 (/3), **D**: CuL2H and **E**: CuL2.

**Fig. S2**.: UV/VIS spectra of the copper(II) – imhm 1:1 system at pH = 9.6 with the variation of the total concentration in the range of 3.2.10–3 – 2.6.10–4 M. (The *d–d* band is shifted towards lower energies with the decrease of concentrations.)

### **The copper(II)- N-methyl-N'-(2-ylmethyl-pyridine)-ethylendiamine (pyrdiam) system**

The pK of the pyridine nitrogen of pyrdiam is too low to be determined. The following deprotonation (pK = 5.61) most probably belongs to the central secondary nitrogen.

As a consequence of the structural similarity, the complexes formed in the copper(II)-pyrdiam system are almost identical with those observed with imhm (Table 1 and S1). The [CuL]2+ complexes of both ligands are dominant in a wide pH-range and their deprotonation take place in an almost identical pH range. The only notable difference between the two systems is the absence of an oligomerization process during the deprotonation of the complex [Cu(pyrdiam)]2+. This is also supported by the unchanged intensity of EPR spectra recorded between pH 8-10 (Table S2, Figure S3). Since there is no other group on the ligand that could undergo deprotonation, the above mentioned process can be only assigned to a proton loss of a metal-bound water molecule, i.e. to the formation of [Cu(pyrdiam)(OH)]+. The different co-ordination behaviour of the two tridentate ligand is clearly the result of the presence of the imidazole rings in imhm, which makes the oligomerization process possible through the formation of imidazolate bridges.

Bis-complexes were also detected in case of pyrdiam, when ligand excess was used. The deprotonation of [CuL2H]3+ is more favored in this case (pK3–pKML2H = 1.49 for imhm and 3.48 for pyrdiam), which probably reflects ethylenediamine-like coordination of both ligands in the equatorial plane of copper(II).

***Synthesis of N-methyl-N'-(2-ylmethyl-pyridine)-ethylendiamine.2HCl (pyrdiam.2HCl)*** *N*-methyl-ethylene-diamine (0.741 g, 10 mmol) and pyridine-5-carboxaldehyde (1.071 g, 10 mmol) were dissolved in 60 mL dry ethanol. The mixture was stirred for 2 h, the formation of the Schiff-base during the reaction was followed by TLC. Palladium on activated charcoal (Fluka) as catalyst was added to the solution very carefully. For the reduction of the Schiff-base H2 gas was bubbled through the solution for 3 hours until the reaction was completed. The volume of the solution was kept constant by adding ethanol. After finishing the reduction procedure HCl gas was bubbled through the clean solution for approx. 15 minutes. Yellowish crystals of the ligand precipitated from the acidified solution. This mixture was then reduced to 10 mL, the product was filtered off and recrystallised from ethanol. The yield of the white, crystalline product is 1.6 g (67.0 %). The structure and purity was demonstrated by NMR spectroscopy and potentiometry. 1H NMR (in water): aromatic = 8.573 (d, 3*J* = 5.1 Hz, 1 H), 7.971 (t, 3*J* = 7.8 Hz, 1 H), 7.544 (d, 3*J* = 7.8 Hz, 1 H), 7.511 (dd, 3*J* = 7.7 and 5.1 Hz, 1 H); aliphatic = 4.390 (s, 2 H, pyr-C**H2**-NH), 3.425 (m, 2 H + 2 H, NH-C**H**2-C**H**2-NH) and 2.756 (s, 3 H, NH-C**H3**).

**Table S1.** pK values of pyrdiam and formation constants () of its copper(II) complexes (as their logarithms, the estimated errors are in parentheses), I=0.1 M NaClO4, T=298 K.

| pK1 | < 1.5 |
| --- | --- |
| pK2 | 5.61(1) |
| pK3 | 9.67(1) |
| Species |  |
| CuL | 14.72(2) |
| CuLH–1 | 5.85(2) |
| CuL2H | 25.6(3) |
| CuL2 | 19.41(3) |
| apKCuLH | 1.68 |
| apKCuL2H | 6.19 |
|  | 4.69 |
|  | 10.03 |
| Fitting parameter (cm3) | 0.005 |
| Number of exp. points | 630 |

a

**Table S2**. Spectroscopic data for the copper(II)-pyrdiam complexes.

| Complex | g0 | A0 (G) | aN,0 (G) | max / nm [] / M–1cm–1 |
| --- | --- | --- | --- | --- |
| ML | 2.117 | 72.2 | 9.7 | 638 [111] |
| MLH–1 | 2.113 | 72.5 | 9.3 | 626 [105] |
| ML2 | 2.115 | 66.2 | 6.9 | 630 [70] |

**Fig. S3**.: Experimental and calculated EPR spectra measured in the copper(II) – pyrdiam system at T = 298 K. A,B: [L] = [M] = 0.005 M, pH = 5.80 (A) and 11.66 (B); C: [L] = 3[M] = 0.012 M, pH = 9.27. The speciation of the main species: 100% ML (A), 100 % MLH–1 (B) and 94 % ML2 (C).
